# Supplementary material for: Structural comparison of GLUT1 to GLUT3 reveal transport regulation mechanism in sugar porter family
Source: Life Sci Alliance. 2021 Feb 3;4(4):e202000858. doi: 10.26508/lsa.202000858 (PMC7898563; doi:10.26508/lsa.202000858)
Supplement: Supplementary file 1 [file LSA-2020-00858_TableS1.xls]

## Sheet: Sheet1
	Table S1. Statistics for Crystallographic Data Collection and Structure Refinement.
	Name		hGLUT1	hGLUT1
	Type		native	bromide
	Data Collection
		Space group	C2	C2
		Cell dimensions
		a. b, c (Å)	120.0, 102.2, 69.0	119.4, 102.7, 67.2
		alpha, beta, gamma (deg)	90.0, 98.9, 90.0	90.0, 99.9, 90.0
		Monomers per asym. unit.	1	1
		Wavelenght (Å)	0.9686	0.9188
		Number of reflections measured	229827	35341
		Number of unique reflections	32166	13041
		Resolution (Å)	48-2.4 (2.5-2.4)a	77-4.0 (4.1-4.0)a
		Rmeas (%)	12.3 (238.0)	7.1 (20.8)
		Mean I/σ(I)	7.2 (0.7)	12.7 (6.4)
		CC(1/2)	99.8 (44.4)	99.8 (54.3)
		Completeness (%)	99.9 (100.0)	97.9 (96.6)
		Redundancy	7.1 (7.6)	2.7 (2.7)
	Refinement
		Resolution (Å)	41.7-2.4 (2.48-2.40)
		No. reflections (work/free)	32117/3161
		Rwork (%)	20.44
		Rfree (%)	22.94
		No. of Atoms
		Protein	3478
		Ligands	65
		Waters	13
		Average B Factors (Å)
		Overall	106
		Protein	105.9
		Ligands	114.1
		Waters	91.8
		RMSD
		Bond lenghts (Å)	0.004
		Bond angles (deg)	0.65
		Ramachandran Plot Statistics
		Favored regions	97.1
		Allowed regions	2.7
		Disallowed regions	0.2
		Rama-Z score	-2.17
		Deposited model (PDB id)	6THA
		aHighest resolution shell is shown in parenthesis.
